# Supplementary material for: Phytohormones and Transcriptome Analyses Revealed the Dynamics Involved in Spikelet Abortion and Inflorescence Development in Rice
Source: MDPI journal article supplement (doi:10.3390/ijms23147887), 2022-07-17
Supplement: s1 [file s1]

Table S1. List of DEGs showing the comparison of RNA-seq and RT-qPCR expression.

| Gene                | Forward Primer        | Reverse Primer         | FC<br>RNA-Seq | FC<br>RT-qPCR |
|---------------------|-----------------------|------------------------|---------------|---------------|
| <i>Os12g0637000</i> | AGTGGAGGTGGCTGGAG     | ATGTAGTGGTATCCGTTGCTG  | -8.9          | -3.9          |
| <i>Os04g0570600</i> | TGGCATTACATCTCAGGTC   | ACCATCACTCCCCATCCT     | -8.81         | -4.5          |
| <i>Os12g0242700</i> | GGCCAATAACCTCGTCTCATC | GCTCTTCCAATCCCTCTAGATG | -8.4          | -3.6          |
| <i>Os12g0242700</i> | GTGAACCACACCCTGGAG    | AGAGTAGAGAGGCGGCAC     | -8.4          | -8.6          |
| <i>Os04g0178300</i> | CAAACAGGAGACCAGAAATGC | TGAAGTGCCTTGATATGCCC   | 7.90          | 3.5           |
| <i>Os07g0526600</i> | CGGGAAAGCATCAAAGACAAG | ACCCCTCTGAAATTGTAAGCTC | 3.7           | 4.3           |
| <i>Os09g0368200</i> | CATCGTCAACTCCACCCTC   | CCACTCTTGTCCACTTCATCTG | 7.4           | 3.7           |
| <i>Os01g0196300</i> | CATGATCTCGGAGCGGAAG   | CTCTGACAGCTTTGACTCGAG  | 7.2           | 4.3           |
